# Supplementary material
Source: HighWire-hosted journal article supplement (https://gut.bmj.com/content/65/9/1439)
Supplement: inline-supplementary-material-1 [file inline-supplementary-material-1.pdf]

**Supplementary Table 1** Subgroup analysis of eradication rates (%) by bacterial susceptibility to CLR (MIC) 4 weeks after completion of first-line eradication therapy

| MIC against isolated <i>H. pylori</i> strains (µg/mL) | Eradication regimen |               |
|-------------------------------------------------------|---------------------|---------------|
|                                                       | VPZ/AMX/CLR         | LPZ/AMX/CLR   |
| ≤ 0.015                                               | 100.0 (3/3)         | 100.0 (7/7)   |
| 0.03                                                  | 100.0 (28/28)       | 100.0 (28/28) |
| 0.06                                                  | 97.4 (74/76)        | 94.4 (68/72)  |
| 0.12                                                  | 97.2 (69/71)        | 100.0 (56/56) |
| 0.25                                                  | 95.2 (20/21)        | 100.0 (14/14) |
| 0.5                                                   | 100.0 (6/6)         | 87.5 (7/8)    |
| 1                                                     | - (0/0)             | - (0/0)       |
| 2                                                     | - (0/0)             | - (0/0)       |
| 4                                                     | 100.0 (6/6)         | 50.0 (1/2)    |
| 8                                                     | 83.3 (5/6)          | 50.0 (3/6)    |
| 16                                                    | 69.2 (9/13)         | 41.7 (5/12)   |
| 32                                                    | 81.3 (26/32)        | 44.4 (16/36)  |
| 64                                                    | 83.7 (36/43)        | 36.4 (20/55)  |
| 128                                                   | - (0/0)             | 0.0 (0/3)     |
| > 128                                                 | - (0/0)             | 100.0 (1/1)   |
| Not applicable                                        | 94.7 (18/19)        | 89.5 (17/19)  |

Data are expressed as percentage and number of subjects in parentheses

AMX, amoxicillin; CLR, clarithromycin; LPZ, lansoprazole; VPZ, vonoprazan
