# Supplementary material
Source: HighWire-hosted journal article supplement (https://gut.bmj.com/content/65/9/1439)
Supplement: inline-supplementary-material-2 [file inline-supplementary-material-2.pdf]

**Supplementary Figure 1** Time course of arithmetic mean serum gastrin levels (Safety Analysis Set) during A) first-line triple therapy and B) second-line triple therapy

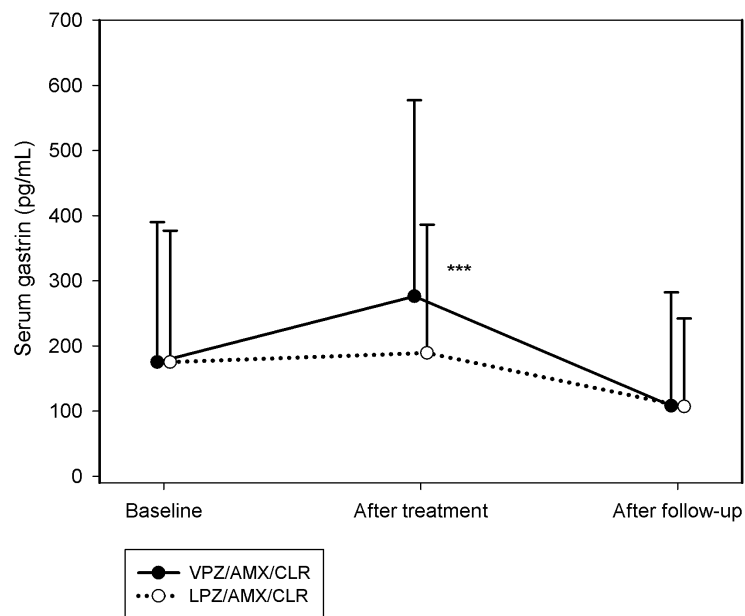

\*\*\*  $P < 0.0001$  for difference between VPZ/AMX/CLR and LPZ/AMX/CLR

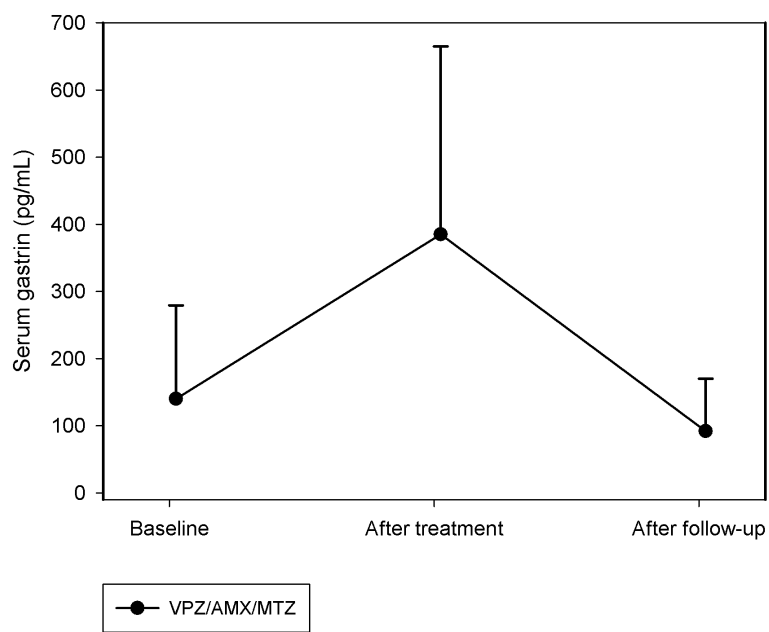

VPZ, vonoprazan; LPZ, lansoprazole; AMX, amoxicillin; CLR, clarithromycin; MTZ, metronidazole

Each bar shows the standard deviation.
